# Supplementary material for: Sensitive electrochemical detection of copper ions based on the copper(ii) ion assisted etching of Au@Ag nanoparticles
Source: Royal Society of Chemistry journal article supplement (doi:10.1039/c5an01888a), 2015-01-01
Supplement: c5an01888a1.pdf [file c5an01888a1.pdf]

## Sensitively electrochemical detection of copper ions based on the copper (II) ion assisted etching of Au@Ag nanoparticles

Tianxiang Wu, Teng Xu, and Zhanfang Ma\*

Department of Chemistry, Capital Normal University, Beijing 100048, China

Email: mazhanfang@cnu.edu.cn

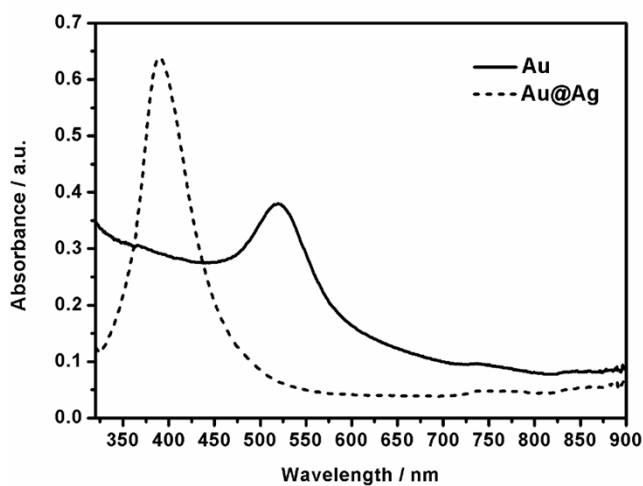

**Fig. S1.** The UV-Vis spectra of AuNPs and Au@AgNPs

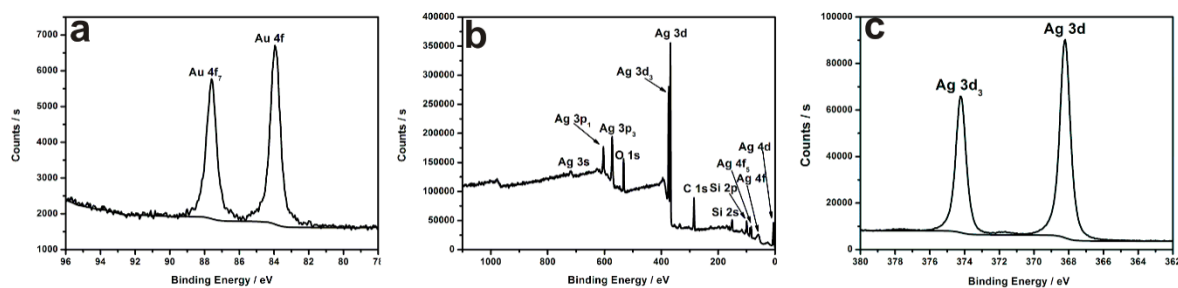

**Fig. S2.** The XPS spectra of prepared Au@AgNPs nanoparticles

**Table S1.** Comparison of this work with other published methods.

| Ref.      | Analytes                            | Detection limit of Cu <sup>2+</sup> (M) | Linear range of Cu <sup>2+</sup> (M)         |
|-----------|-------------------------------------|-----------------------------------------|----------------------------------------------|
| 1         | Cu <sup>2+</sup>                    | 2.0×10 <sup>-6</sup>                    | 1.0×10 <sup>-6</sup> - 5.0×10 <sup>-2</sup>  |
| 2         | Cu <sup>2+</sup>                    | 7.8×10 <sup>-6</sup>                    | 1.0×10 <sup>-5</sup> - 5.0×10 <sup>-1</sup>  |
| 3         | Cu <sup>2+</sup>                    | 3.5×10 <sup>-9</sup>                    | 7.9×10 <sup>-9</sup> - 3.2×10 <sup>-2</sup>  |
| 4         | Cu <sup>2+</sup>                    | 1.6×10 <sup>-6</sup>                    | 2.0×10 <sup>-6</sup> - 1.0×10 <sup>-1</sup>  |
| 5         | Cu <sup>2+</sup>                    | 8.1×10 <sup>-8</sup>                    | 2.0×10 <sup>-7</sup> - 1.0×10 <sup>-1</sup>  |
| 6         | Cu <sup>2+</sup> , Pb <sup>2+</sup> | 2.1×10 <sup>-9</sup>                    | 5.0 ×10 <sup>-9</sup> - 1.0×10 <sup>-4</sup> |
| This work | Cu <sup>2+</sup>                    | 3.0×10 <sup>-10</sup>                   | 1 ×10 <sup>-9</sup> - 1.0×10 <sup>-4</sup>   |

## References

- [1] S. Yoshimoto, H. Mukai, T. Kitano, Y. Sohrin, Copper(II)-selective membrane electrode based on hydrotris(3-isopropylpyrazolyl)methane in a poly(vinyl chloride) matrix, *Anal. Chim. Acta* 494 (2003) 207-213.
- [2] V.K. Gupta, R.N. Goyal, N. Bachheti, L.P. Singh, S. Agarwal, A copper-selective electrode based on bis(acetylaceton)propylenediimine, *Talanta* 68 (2005) 193-197.
- [3] M.H. Mashhadizadeh, K. Eskandari, A. Foroumadi, A. Shafiee, Copper(II) modified carbon paste electrodes based on self-assembled mercapto compounds-gold-nanoparticle, *Talanta* 76 (2008) 497-502.
- [4] A.K. Jain, V.K. Gupta, L.P. Singh, J.R. Raison, Chelating ionophore based membrane sensors for copper(II) ions, *Talanta* 66 (2005) 1355-1361.
- [5] S. Chandra, C.K. Singh, H. Agarwal, R.K. Agarwal, A copper(II)-selective PVC membrane electrode based on a macrocyclic ligand, 1,2,5,6,8,11-hexaazacyclododeca-7,12-dione-2,4,8,10-tetraene, *Anal. Sci.* 23 (2007) 683-687.
- [6] M. Bagherzadeh, M. Pirmoradian, F. Riahi, Electrochemical detection of Pb and Cu by using DTPA functionalized magnetic nanoparticles, *Electrochim. Acta* 115 (2014) 573-580.
